# Supplementary material
Source: Springer Nature journal article supplement (https://www.springermedizin.de/resource/supplementary/12943_2013_1333_MOESM5_ESM.pdf/9552728)
Supplement: MOESM5 [file 9552728]

**Additional File 5: Patient information for all paediatric AML patients used for HM450 DNA methylation interrogation, SEQUENOM MassARRAY® EpiTYPER® validation and gene expression analysis**

| <b>Characteristic</b>           | <b>450K Methylation Cohort (n=42)</b> | <b>Sequenom Methylation Cohort (n=61)</b> | <b>Quantitative RT-PCR (expression cohort) (n=70)</b> |
|---------------------------------|---------------------------------------|-------------------------------------------|-------------------------------------------------------|
| Samples used, no. (%)           |                                       |                                           |                                                       |
| Primary Leukaemic Samples       | 18 (43)                               | 24 (39)                                   | 27 (39)                                               |
| Matched relapse                 | 2 (5)                                 | 4 (7)                                     | 4 (6)                                                 |
| Matched non-Leukaemic           | 13 (31)                               | 14 (23)                                   | 20 (28)                                               |
| Non-Matched non-Leukaemic       | 4 (9)                                 | 11 (18)                                   | 11 (16)                                               |
| Cell Lines                      | 5 (12)                                | 8 (13)                                    | 8 (11)                                                |
| Age at diagnosis                |                                       |                                           |                                                       |
| Mean                            | 7.5                                   | 9.98                                      | 10.33                                                 |
| Range                           | 0.54-15.49                            | 0.54-17.28                                | 0.54-17.28                                            |
| Sex, no. (%)                    |                                       |                                           |                                                       |
| Female                          | 11 (61)                               | 14 (58)                                   | 15 (56)                                               |
| Male                            | 7 (39)                                | 10 (42)                                   | 12 (44)                                               |
| FAB Classifications, no. (%)    |                                       |                                           |                                                       |
| M5a                             | 13 (72)                               | 14 (58)                                   | 16 (59)                                               |
| M5b                             | 5 (28)                                | 6 (25)                                    | 7 (26)                                                |
| Other                           |                                       | 4 (17)                                    | 4 (15)                                                |
| Genetic Abnormalities, no. (%)  |                                       |                                           |                                                       |
| WT1                             |                                       | 1 (4)                                     | 1 (4)                                                 |
| RUNX1                           |                                       | 2 (8)                                     | 2 (7)                                                 |
| MLL rearrangement               | 6 (33)                                | 7 (28)                                    | 8 (29)                                                |
| FLT-ITD                         |                                       |                                           | 1 (4)                                                 |
| Other                           |                                       | 1 (4)                                     | 1 (4)                                                 |
| Not Defined/None                | 12 (66)                               | 14 (56)                                   | 14 (52)                                               |
| Cytogenetics, no. (%)           |                                       |                                           |                                                       |
| Normal Karyotype (CN-AML)       | 5 (28)                                | 5 (21)                                    | 5 (18)                                                |
| Hyperdiploid                    | 4 (22)                                | 4 (17)                                    | 6 (21)                                                |
| Pseudodiploid                   |                                       | 1 (4)                                     | 1 (4)                                                 |
| Complex Karyotype               |                                       | 1 (4)                                     | 1 (4)                                                 |
| Chr 11 rearrangement            | 6 (33)                                | 8 (33)                                    | 8 (28)                                                |
| +8                              | 1 (6)                                 | 1 (4)                                     | 3 (11)                                                |
| Other                           | 2 (11)                                | 4 (17)                                    | 4 (14)                                                |
| Relapse Status, no. (%)         |                                       |                                           |                                                       |
| No Relapse                      | 11 (61)                               | 11 (46)                                   | 12 (44)                                               |
| Relapse/deceased                | 7 (39)                                | 9 (38)                                    | 11 (41)                                               |
| Not Recorded                    |                                       | 4 (16)                                    | 4 (15)                                                |
| Overlapping samples in analysis |                                       |                                           |                                                       |
| HM450 - SEQUENOM                |                                       | 42                                        |                                                       |
| HM450 - qRT-PCR                 |                                       |                                           | 42                                                    |
| SEQUENOM - qRT-PCR              |                                       |                                           | 61                                                    |
| Sample types                    |                                       |                                           |                                                       |
| Patient Bone Marrow             | 1                                     | 17                                        | 17                                                    |
| Patient Smear Film              | 33                                    | 31                                        | 41                                                    |
